# Supplementary material for: Breast cancer or surrounding normal tissue? A successful discrimination by FTIR or Raman microspectroscopy
Source: Royal Society of Chemistry journal article supplement (doi:10.1039/d2an00622g), 2022-01-01
Supplement: d2an00622g1.pdf [file d2an00622g1.pdf]

## Supplementary Material

### Breast Cancer or Surrounding Normal Tissue? A Successful Discrimination by FTIR and Raman Microspectroscopies

Adriana P. Mamede<sup>a†</sup>, Inês P. Santos<sup>a†\*</sup>, Ana L.M. Batista de Carvalho<sup>a</sup>, Paulo Figueiredo<sup>b</sup>, Maria C. Silva<sup>c</sup>, Maria P.M. Marques<sup>a, d</sup>, Luís A.E. Batista de Carvalho<sup>a</sup>

<sup>a</sup> "Unidade de I&D Química-Física Molecular" (QFM-UC) Department of Chemistry, University of Coimbra, Coimbra, Portugal

<sup>b</sup> Pathology Department, Portuguese Institute of Oncology Francisco Gentil (IPOFG), Coimbra, Portugal

<sup>c</sup> Surgery Department, Portuguese Institute of Oncology Francisco Gentil (IPOFG), Coimbra, Portugal

<sup>d</sup> Department of Life Sciences, University of Coimbra, Coimbra, Portugal

<sup>†</sup>These authors contributed equally to this work

\*Correspondence: [ips@uc.pt](mailto:ips@uc.pt)

## Table of Contents

### Materials and Methods

Xylene ( $C_6H_4(CH_3)_2$ ) and ethanol (99%) were purchased from Merck (Lisbon, Portugal).

### Figures

Figure S1 – Home-made sample holders for the Raman WITec Alpha300R (A) and FTIR Bruker Hyperion 3000 (B) microscope tables, designed to ensure a location reproducibility of the measured regions of interest within the tissue, and the spatial complementarity between Raman and FTIR measurements.

### Material and Methods

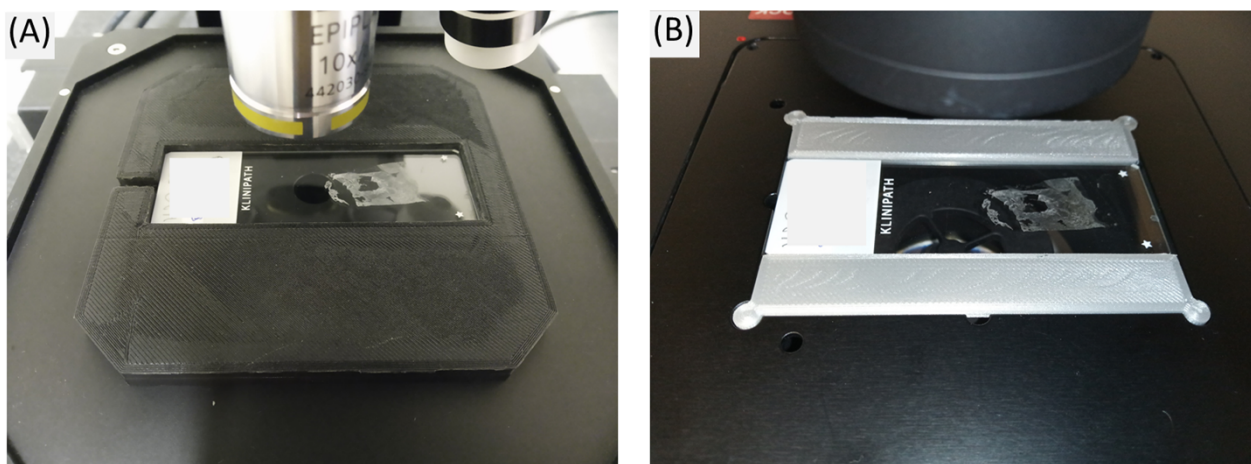

**Figure S1.** Home-made sample holders for the Raman WITec Alpha300R (A) and FTIR Bruker Hyperion 3000 (B) microscope tables, designed to ensure a location reproducibility of the measured regions of interest within the tissue, and the spatial complementarity between Raman and FTIR measurements.
